# Supplementary material for: Genomic Imprinting in the Arabidopsis Embryo Is Partly Regulated by PRC2
Source: PubMed Central journal article supplement (PMC3854695; doi:10.1371/journal.pgen.1003862), 2013-12-05

**A**

AT1G02780

TCol-0 / ALer

Col-0 x Ler

Ler x Col-0

2-4cell

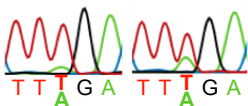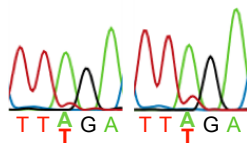

2-4c-reads (Autran, 2011):  
1111 mat. vs. 261 pat.

globular

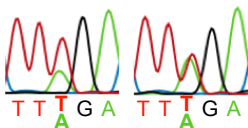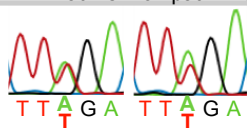

glob-reads (Autran, 2011):  
638 mat. vs. 716 pat.

seedling  
(4-leaf)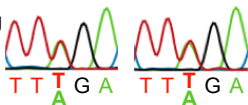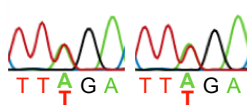**B**

AT1G02780

TCol-0 / ALer

Col-0 x Ler

Ler x Col-0

genomic DNA

genomic DNA

n.d.

N N N N N

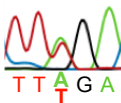

Supplement: pgen.1003862.s001.pdf [file pgen.1003862.s001.pdf]
