# Supplementary material for: Genomic Imprinting in the Arabidopsis Embryo Is Partly Regulated by PRC2
Source: PubMed Central journal article supplement (PMC3854695; doi:10.1371/journal.pgen.1003862), 2013-12-05

**A** Col-0 x Ler genomic DNA Ler x Col-0 genomic DNA

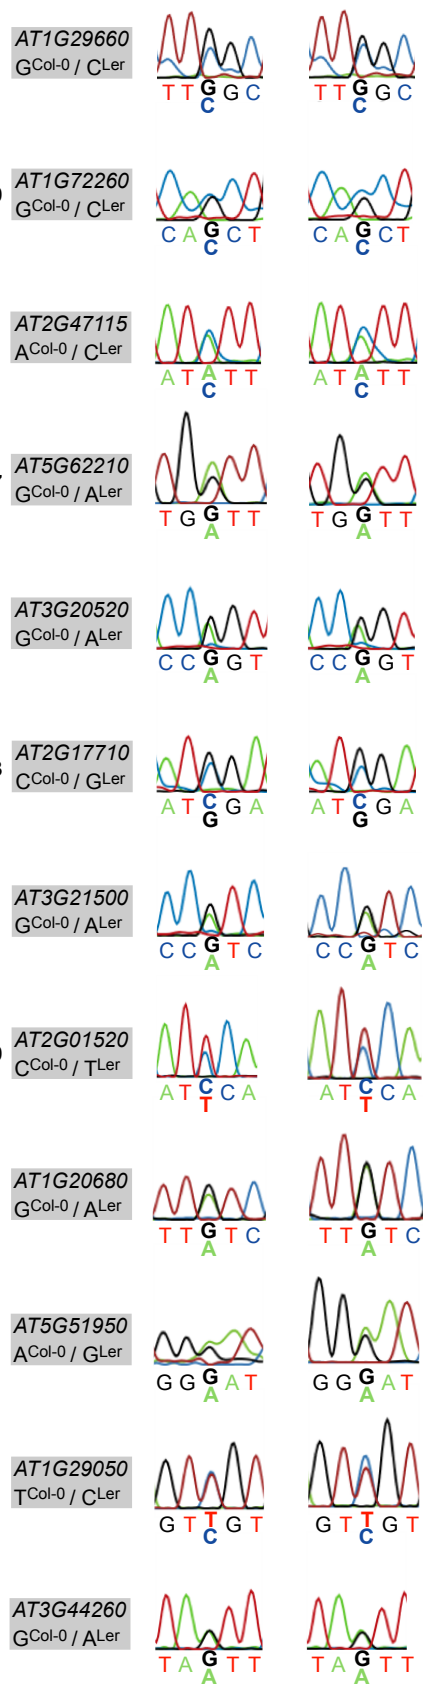

**B** Col-0 x Ler genomic DNA Ler x Col-0 genomic DNA

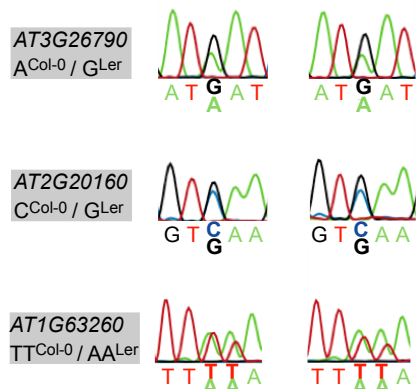

Supplement: pgen.1003862.s002.pdf [file pgen.1003862.s002.pdf]
