# Supplementary material for: Genomic Imprinting in the Arabidopsis Embryo Is Partly Regulated by PRC2
Source: PubMed Central journal article supplement (PMC3854695; doi:10.1371/journal.pgen.1003862), 2013-12-05
Supplement: pgen.1003862.s003.pdf [file pgen.1003862.s003.pdf]

gDNA ratios  
Col-0 : Ler

9:1

3:1

1:1

1:3

1:9

AT1G29660  
G<sup>Col-0</sup> / C<sup>Ler</sup>

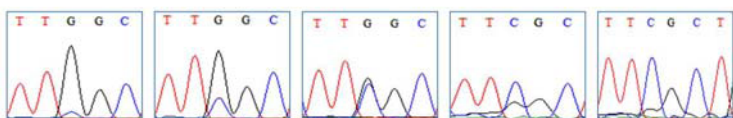

AT1G72260  
G<sup>Col-0</sup> / C<sup>Ler</sup>

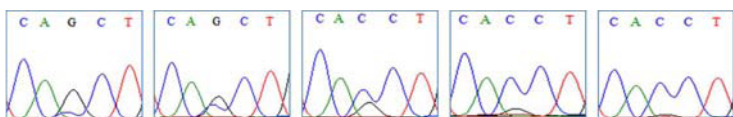

AT2G47115  
A<sup>Col-0</sup> / C<sup>Ler</sup>

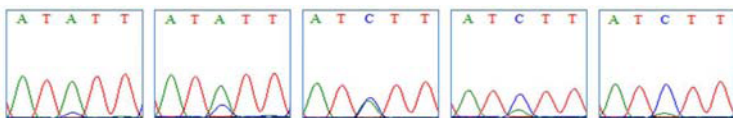

AT5G62210  
G<sup>Col-0</sup> / A<sup>Ler</sup>

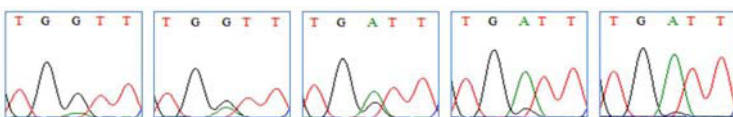

AT3G20520  
G<sup>Col-0</sup> / A<sup>Ler</sup>

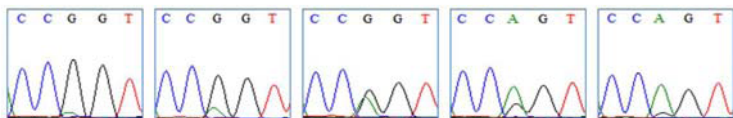

AT2G17710  
C<sup>Col-0</sup> / G<sup>Ler</sup>

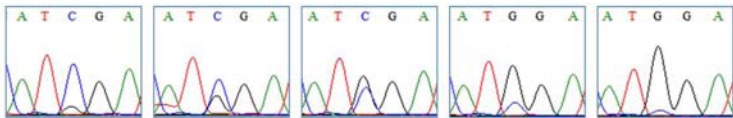

AT3G21500  
G<sup>Col-0</sup> / A<sup>Ler</sup>

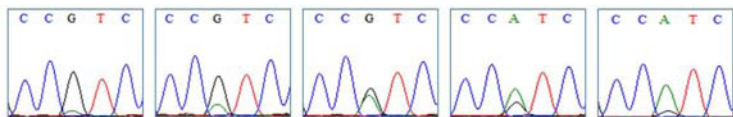

AT2G01520  
C<sup>Col-0</sup> / T<sup>Ler</sup>

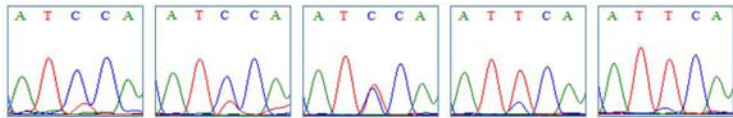

AT1G20680  
G<sup>Col-0</sup> / A<sup>Ler</sup>

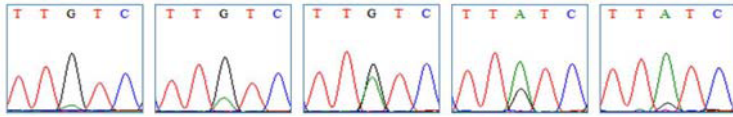

AT5G51950  
A<sup>Col-0</sup> / G<sup>Ler</sup>

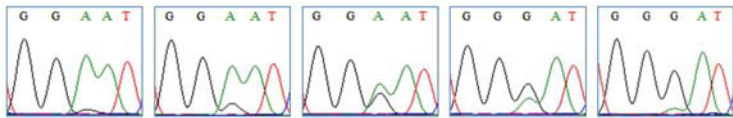

AT1G29050  
T<sup>Col-0</sup> / C<sup>Ler</sup>

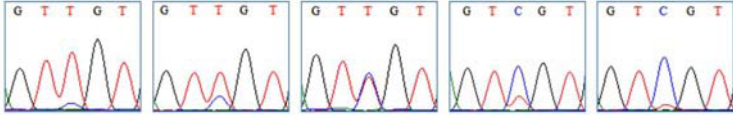

AT3G26790  
A<sup>Col-0</sup> / G<sup>Ler</sup>

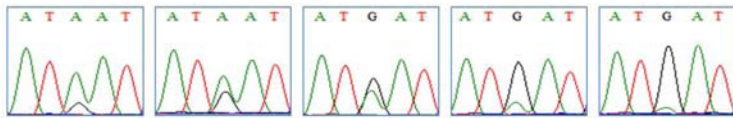

9:1

3:1

1:1

1:3

1:9
