# Supplementary material for: Genomic Imprinting in the Arabidopsis Embryo Is Partly Regulated by PRC2
Source: PubMed Central journal article supplement (PMC3854695; doi:10.1371/journal.pgen.1003862), 2013-12-05

**A**

AT2G20160

C<sup>Col-0</sup> / G<sup>Ler</sup>

Col-0 x Ler

Ler x Col-0

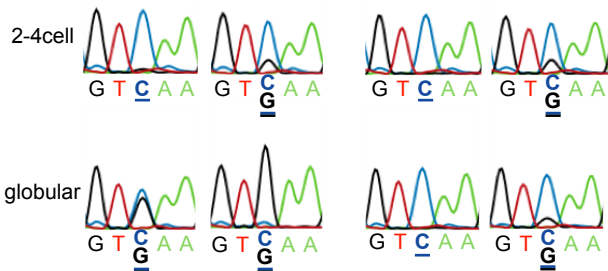**B**

AT1G63260

TT<sup>Col-0</sup> / AA<sup>Ler</sup>

Col-0 x Ler

Ler x Col-0

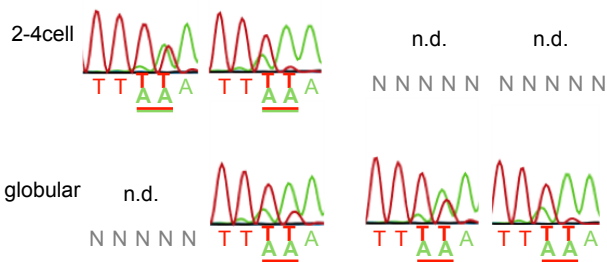

Supplement: pgen.1003862.s005.pdf [file pgen.1003862.s005.pdf]
