# Supplementary material for: Genomic Imprinting in the Arabidopsis Embryo Is Partly Regulated by PRC2
Source: PubMed Central journal article supplement (PMC3854695; doi:10.1371/journal.pgen.1003862), 2013-12-05

**A**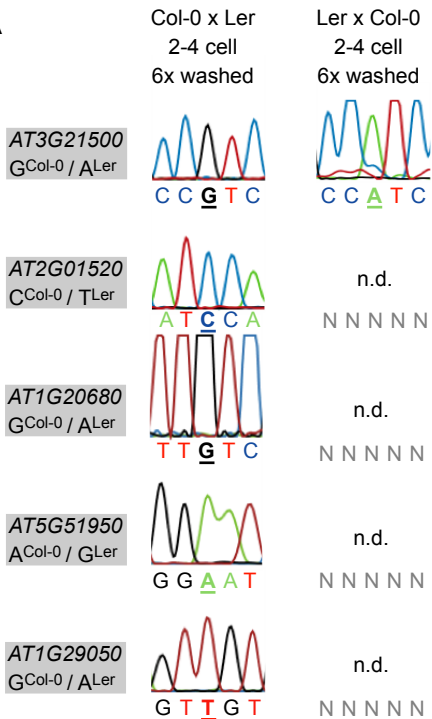**B**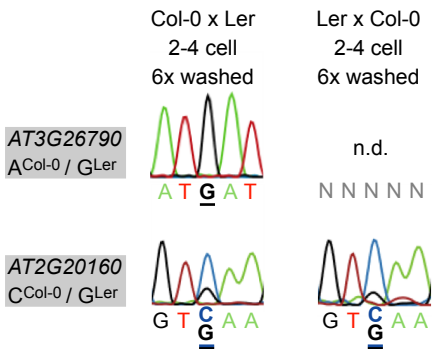**C**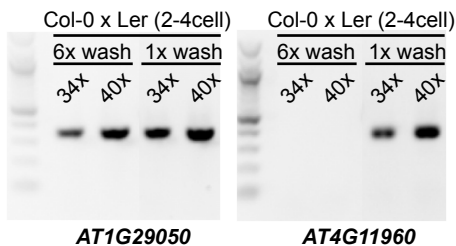

Supplement: pgen.1003862.s006.pdf [file pgen.1003862.s006.pdf]
