# Supplementary material for: Genomic Imprinting in the Arabidopsis Embryo Is Partly Regulated by PRC2
Source: PubMed Central journal article supplement (PMC3854695; doi:10.1371/journal.pgen.1003862), 2013-12-05

*pAT3G21500::GUS*

2cell

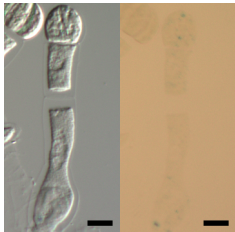

4cell

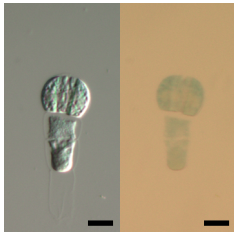

8cell

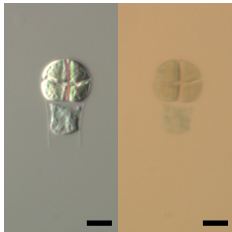

Supplement: pgen.1003862.s009.pdf [file pgen.1003862.s009.pdf]
