# Supplementary material for: Genomic Imprinting in the Arabidopsis Embryo Is Partly Regulated by PRC2
Source: PubMed Central journal article supplement (PMC3854695; doi:10.1371/journal.pgen.1003862), 2013-12-05
Supplement: pgen.1003862.s010.pdf [file pgen.1003862.s010.pdf]

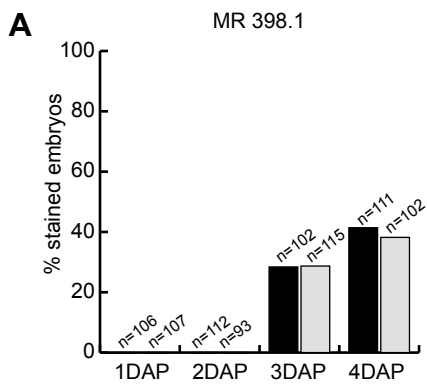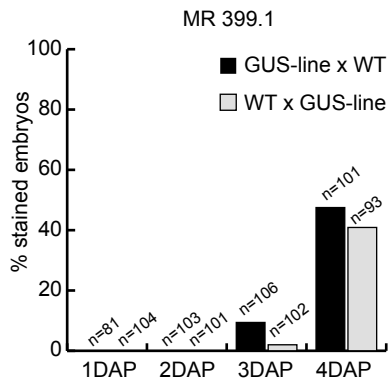

**B** Col x *FUS3::GUS* (MR 399)

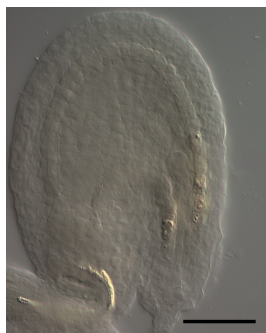

2 DAP  
1-2 cell

*FUS3::GUS* (MR 399) x Col

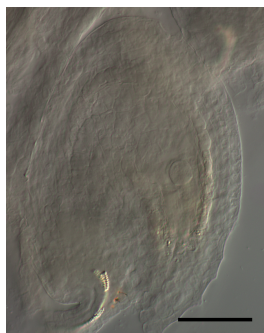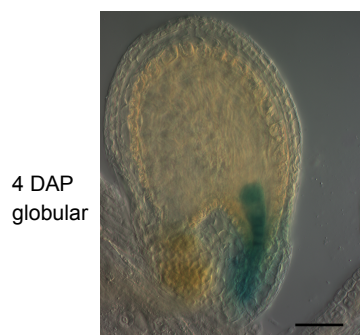

4 DAP  
globular

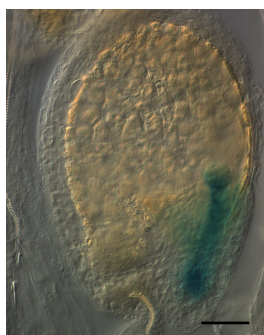

**C** *FUS3::GUS* (MR 398) selfed

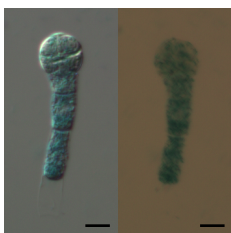

8 cell

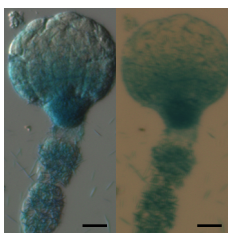

globular
