# Supplementary material for: Genomic Imprinting in the Arabidopsis Embryo Is Partly Regulated by PRC2
Source: PubMed Central journal article supplement (PMC3854695; doi:10.1371/journal.pgen.1003862), 2013-12-05

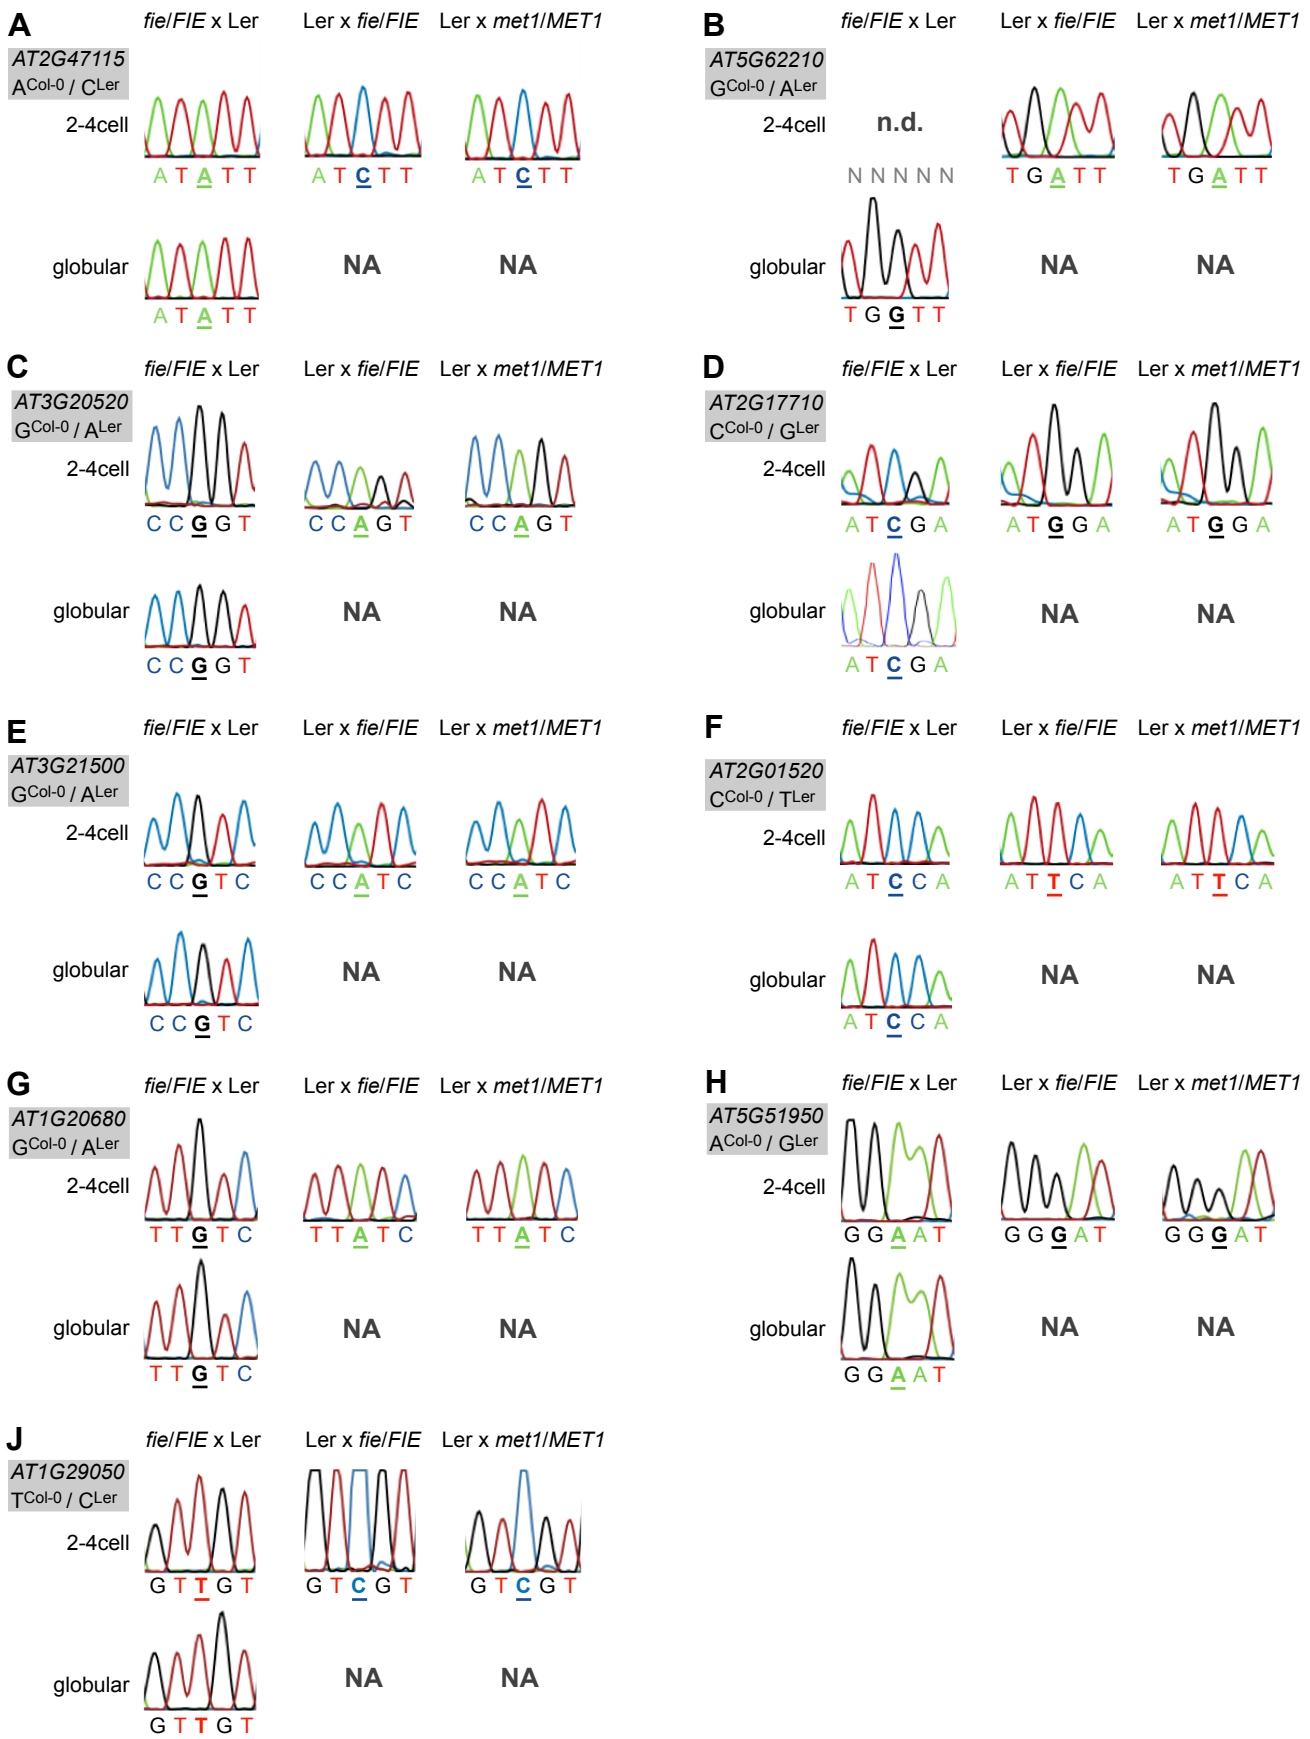

Supplement: pgen.1003862.s011.pdf [file pgen.1003862.s011.pdf]
