# Supplementary material for: Genomic Imprinting in the Arabidopsis Embryo Is Partly Regulated by PRC2
Source: PubMed Central journal article supplement (PMC3854695; doi:10.1371/journal.pgen.1003862), 2013-12-05
Supplement: pgen.1003862.s013.pdf [file pgen.1003862.s013.pdf]

**Table S2. Phenotyping of T-DNA lines disrupting confirmed MEGs or the PEG.** No obvious mutant phenotype was observed.

| <b>T-DNA line</b> | <b>locus</b>     | <b>insertion site</b> | <b>seed set<sup>1</sup></b> | <b>embryo patterning<sup>2</sup></b> | <b>comments</b>                                    |
|-------------------|------------------|-----------------------|-----------------------------|--------------------------------------|----------------------------------------------------|
| SAIL_641_B05      | <i>AT1G29660</i> | 1 <sup>st</sup> exon  | wild-type                   | wild-type                            | MEG                                                |
| SALK_023064C      | <i>AT1G29660</i> | 5 <sup>th</sup> exon  | wild-type                   | wild-type                            | MEG                                                |
| SALK_039929C      | <i>AT1G72260</i> | promoter              | wild-type                   | wild-type                            | MEG                                                |
| GABI_054H02       | <i>AT1G72260</i> | 3 <sup>rd</sup> exon  | wild-type                   | wild-type                            | MEG                                                |
| FLAG_382E11       | <i>AT2G47115</i> | 5 <sup>th</sup> exon  | wild-type                   | wild-type                            | MEG                                                |
| SALK_038225       | <i>AT5G62210</i> | 2 <sup>nd</sup> exon  | wild-type                   | wild-type                            | MEG                                                |
| GABI_243D08       | <i>AT5G62210</i> | intron                | wild-type                   | wild-type                            | MEG                                                |
| SAIL_330_H06      | <i>AT5G62210</i> | promoter              | wild-type                   | wild-type                            | MEG                                                |
| SALK_010358.23.30 | <i>AT3G20520</i> | 2 <sup>nd</sup> exon  | wild-type                   | wild-type                            | MEG                                                |
| SALK_152374.35.55 | <i>AT3G20520</i> | 4 <sup>th</sup> exon  | wild-type                   | wild-type                            | MEG                                                |
| SALK_067511       | <i>AT2G17710</i> | promoter              | wild-type                   | wild-type                            | MEG                                                |
| SALK_067639       | <i>AT2G17710</i> | promoter              | wild-type                   | wild-type                            | MEG                                                |
| SALK_112762       | <i>AT3G21500</i> | 4 <sup>th</sup> exon  | wild-type                   | wild-type                            | MEG                                                |
| SALK_039162.21.10 | <i>AT3G26790</i> | 1 <sup>st</sup> exon  | wild-type                   | wild-type                            | PEG; late phenotype (Raz et al. 2001) <sup>3</sup> |

<sup>1</sup> mature siliques of 12-24 genotyped individuals were opened and examined for aborted seeds or infertile ovules.

<sup>2</sup> siliques at different stages were cleared using Hoyer's solution and analyzed for patterning defects.

<sup>3</sup> Raz et al. 2001 find a prolonged cell division phase in late embryos (torpedo stage). We analyzed earlier stages only.
