# Supplementary material for: Genomic Imprinting in the Arabidopsis Embryo Is Partly Regulated by PRC2
Source: PubMed Central journal article supplement (PMC3854695; doi:10.1371/journal.pgen.1003862), 2013-12-05
Supplement: pgen.1003862.s017.pdf [file pgen.1003862.s017.pdf]

**Table S6. All primers used in this study.**

| primR number | sequence (5'-3')          | general use     | description                                    |
|--------------|---------------------------|-----------------|------------------------------------------------|
| primR 43     | TCCAAATCCTCCAATGGAAC      | RT-PCR & Sanger | AT3G21500                                      |
| primR 44     | TGACCGTCCTTCTTGCCTTC      | RT-PCR & Sanger | AT3G21500                                      |
| primR 45     | AAGATCGTCACCCAGGCTCTG     | RT-PCR & Sanger | AT3G44260                                      |
| primR 46     | TCGTGACTCGTGAAGTCTGG      | RT-PCR & Sanger | AT3G44260                                      |
| primR 49     | TTCACTCGCTACACAAGGAAGA    | RT-PCR & Sanger | AT2G01520                                      |
| primR 50     | TCGTTTTGCTTCTCCAGAT       | RT-PCR & Sanger | AT2G01520                                      |
| primR 51     | TGGAAACAGGAGTCTTGG        | RT-PCR & Sanger | AT2G47115                                      |
| primR 52     | TGCTGACGGACATTTGTGTTT     | RT-PCR & Sanger | AT2G47115                                      |
| primR 53     | GCAAAGCTAAACAACCGAAC      | RT-PCR & Sanger | AT1G20680                                      |
| primR 54     | TGGCAGAATCTGTAGAATCGAG    | RT-PCR & Sanger | AT1G20680                                      |
| primR 57     | GCCTCTCGTGGTAGCATTTCAA    | RT-PCR & Sanger | AT5G51950                                      |
| primR 58     | CGATGGTAGGGCAAGGTATG      | RT-PCR & Sanger | AT5G51950                                      |
| primR 59     | TTCATGCCTCAGTTTCTACTCCA   | RT-PCR & Sanger | AT1G29660                                      |
| primR 60     | CGCCATAAAGCATTGATGTA      | RT-PCR & Sanger | AT1G29660                                      |
| primR 61     | CCCAGGTTATTCTGGGAAG       | RT-PCR & Sanger | AT1G24090 / At1G24095                          |
| primR 62     | GGCTCAGCTGCTTTAGACTG      | RT-PCR & Sanger | AT1G24090 / At1G24095                          |
| primR 63     | GCTCGGTAGAGAAGTTGGTTC     | RT-PCR & Sanger | AT1G29050                                      |
| primR 64     | GGTTGATCAAAAACGTCGAT      | RT-PCR & Sanger | AT1G29050                                      |
| primR 65     | AAAGAATATGCTTGTGTATTGAA   | RT-PCR & Sanger | AT5G42650                                      |
| primR 66     | ATAACAATGCGCCGGTAAG       | RT-PCR & Sanger | AT5G42650                                      |
| primR 115    | GTGGTTCAAACCGGAGACAT      | RT-PCR & Sanger | AT5G42650                                      |
| primR 116    | GGTGGGATGAAGATTTTGT       | RT-PCR & Sanger | AT5G42650                                      |
| primR 67     | CAAGATGGTAAGATTGGGATAGTG  | RT-PCR & Sanger | AT2G44470                                      |
| primR 68     | GGAGATGAGCGGTGAAGTGT      | RT-PCR & Sanger | AT2G44470                                      |
| primR 71     | TCATCCTTGAAAAGGAGACAAA    | RT-PCR & Sanger | AT3G20520                                      |
| primR 72     | GAGAAGAAGCAGGAGGCTGA      | RT-PCR & Sanger | AT3G20520                                      |
| primR 117    | AAGTGTACCGCGAATTGG        | RT-PCR & Sanger | AT3G20520                                      |
| primR 118    | TTTCTCTGCTTGTGATGG        | RT-PCR & Sanger | AT3G20520                                      |
| primR 73     | TCTCTTAGTTTGAAGTTAGATTCAG | RT-PCR & Sanger | AT2G17710                                      |
| primR 74     | TGATCTTCGGTTCCAGGTC       | RT-PCR & Sanger | AT2G17710                                      |
| primR 137    | CGCTTCTTCCCATCTCAG        | RT-PCR & Sanger | AT2G17710                                      |
| primR 138    | ACACGAGCTGACGCTTAAT       | RT-PCR & Sanger | AT2G17710                                      |
| primR 77     | AACATGTACCTGCGGCAAAA      | RT-PCR & Sanger | AT3G58780                                      |
| primR 78     | TTTGATCTCGACGTGTTTT       | RT-PCR & Sanger | AT3G58780                                      |
| primR 79     | GAGTGTTCATGGCACACAC       | RT-PCR & Sanger | AT1G72260                                      |
| primR 80     | TCCCTGTGATCAAAACAAGTAAA   | RT-PCR & Sanger | AT1G72260                                      |
| primR 81     | TGTTGTGGTTTGGCAATCTT      | RT-PCR & Sanger | AT1G63260                                      |
| primR 82     | GTATCCTGCGGTGAATGCT       | RT-PCR & Sanger | AT1G63260                                      |
| primR 103    | CTGTTGTGGTTTGGCAATCTT     | RT-PCR & Sanger | AT1G63260                                      |
| primR 104    | GCGATCTCAATGTGGTCCCT      | RT-PCR & Sanger | AT1G63260                                      |
| primR 168    | GGAGAATCCGGTGAAGTGT       | RT-PCR & Sanger | AT1G63260                                      |
| primR 169    | GCCAAACCACAACAGTACCA      | RT-PCR & Sanger | AT1G63260                                      |
| primR 83     | TGCGAAGCTCTTCTTCTTCC      | RT-PCR & Sanger | AT2G20160                                      |
| primR 84     | CAGATGGTAGCGCACATGAT      | RT-PCR & Sanger | AT2G20160                                      |
| primR 135    | TGCGAAGCTCTTCTTCTTCC      | RT-PCR & Sanger | AT2G20160                                      |
| primR 136    | CGCAGAGTTCGTGAAAAACA      | RT-PCR & Sanger | AT2G20160                                      |
| primR 85     | CACTGGCTCATCTCCACATTT     | RT-PCR & Sanger | AT2G24430                                      |
| primR 86     | CGACTTCACTCCAAGTCCCTCA    | RT-PCR & Sanger | AT2G24430                                      |
| primR 105    | AAGTCCATGCACTGGCTCAT      | RT-PCR & Sanger | AT2G24430                                      |
| primR 106    | AGCACCCCATGGACTCTTC       | RT-PCR & Sanger | AT2G24430                                      |
| primR 87     | AAGTGTGGTGGAGCAACAG       | RT-PCR & Sanger | AT3G63480                                      |
| primR 88     | AGTAGAAGCCACTGCGCCTA      | RT-PCR & Sanger | AT3G63480                                      |
| primR 107    | GCATCCTGAAGATGCGAGT       | RT-PCR & Sanger | AT3G63480                                      |
| primR 108    | TGGCTCAGAGAAACGAGACA      | RT-PCR & Sanger | AT3G63480                                      |
| primR 89     | CATACGTCGGAGAGAGCTGA      | RT-PCR & Sanger | AT3G26790                                      |
| primR 90     | AAACCCAAAGAGATCCACCA      | RT-PCR & Sanger | AT3G26790                                      |
| primR 109    | CACCATCAAGAATACCATGAGC    | RT-PCR & Sanger | AT3G26790                                      |
| primR 110    | GACACGACGGCTCTTACCTC      | RT-PCR & Sanger | AT3G26790                                      |
| primR 93     | CTTTCCTAATGAGAGCAAAGTTTC  | RT-PCR & Sanger | AT4G11960                                      |
| primR 94     | TCCCAATGATAGTAAACACCAA    | RT-PCR & Sanger | AT4G11960                                      |
| primR 95     | CATGCTTCTTCTCGGCTA        | RT-PCR & Sanger | AT1G02780 (BiG)                                |
| primR 96     | ATGAAGGGTCTGCTCACTCTGG    | RT-PCR & Sanger | AT1G02780 (BiG)                                |
| primR 97     | ACGCAACAACCAACTCTGA       | RT-PCR & Sanger | AT5G62210                                      |
| primR 98     | GAAGTTCCAAATCCGTGAA       | RT-PCR & Sanger | AT5G62210                                      |
| primR 99     | CTCCAACCAAAAGACCTTGG      | RT-PCR & Sanger | AT1G57800                                      |
| primR 100    | CCCCGATCAACTTGTCCAT       | RT-PCR & Sanger | AT1G57800                                      |
| primR 113    | TCTTGCCACTGGAAGCATTT      | RT-PCR & Sanger | AT1G57800                                      |
| primR 114    | CCCCGATCAACTTGTCCAT       | RT-PCR & Sanger | AT1G57800                                      |
| primR 101    | GGCTCCTCTCAATCTCTTGC      | RT-PCR & Sanger | AT5G52060                                      |
| primR 102    | TGTCAAGTTCAAAAGAAAGATGCAG | RT-PCR & Sanger | AT5G52060                                      |
| primR 119    | TCAAAGTTCTGCAGATTATCCG    | genotyping      | SALK_112762.41.75 = 43-1                       |
| primR 120    | TTCCACAATTAGATTCGACCC     | genotyping      | SALK_112762.41.75 = 43-1                       |
| primR 121    | TAGATCGAACCAACCGTGGTTC    | genotyping      | FLAG_382E11 = 51-1                             |
| primR 122    | GGGATATGAACAATTGGCCATG    | genotyping      | FLAG_382E11 = 51-1                             |
| primR 123    | GAAACACAGCTGCCTAGCTG      | genotyping      | SAIL_641_B05 = 59-1                            |
| primR 124    | CTTCTCTGATTCACGAGCTG      | genotyping      | SAIL_641_B05 = 59-1                            |
| primR 125    | ATTCGATGGAAAACATATGGGG    | genotyping      | SALK_023064.22.75 = 59-2                       |
| primR 126    | TAGATCCAGTTTTCAGCGAAGC    | genotyping      | SALK_023064.22.75 = 59-2                       |
| primR 127    | ACGCTCCATTACAAATTTTCA     | genotyping      | SALK_039929.55.25 = 79-1                       |
| primR 128    | GAACTCTATGCGTGCACAGAG     | genotyping      | SALK_039929.55.25 = 79-1                       |
| primR 129    | TGTATTTTCAATGGTGTGGTGG    | genotyping      | SALK_038225.46.35 = 97-1                       |
| primR 130    | TCCTTCTTAACCTTCGAGCC      | genotyping      | SALK_038225.46.35 = 97-1                       |
| primR 131    | TGTATTTTCAATGGTGTGGTGG    | genotyping      | GABI_243D08 = 97-2                             |
| primR 132    | TCCTTCTTAACCTTCGAGCC      | genotyping      | GABI_243D08 = 97-2                             |
| primR 133    | TGAGCTAATTTGGTAGGTGGG     | genotyping      | SAIL_330_H06 = 97-3                            |
| primR 134    | TAATGGCTTTGGTTTTATCCGG    | genotyping      | SAIL_330_H06 = 97-3                            |
| primR 139    | ctcgagattatccggtgagaaa    | genotyping      | SALK_112762.41.75 = 43-1 (replacing primR 119) |
| primR 140    | ACCTTAACCTTGCAGTGTCA      | genotyping      | SALK_039929.55.25 = 79-1 (replacing primR 127) |
| primR 165    | CAAAGGAACACTCTCATTCGC     | genotyping      | SALK_067511 & SALK_067639 = 73-1 & 73-2        |
| primR 166    | TCCAACGCTACGCTACCTTTC     | genotyping      | SALK_067511 & SALK_067639 = 73-1 & 73-3        |

|               |                                    |                           |                                                            |
|---------------|------------------------------------|---------------------------|------------------------------------------------------------|
| priMR 170     | GAAACCAGACTCAAGCTGTGC              | genotyping                | SALK_010358.23.30 = 71-1                                   |
| priMR 171     | TTTGCCTAGAAAGCACTGTCC              | genotyping                | SALK_010358.23.30 = 71-1                                   |
| priMR 172     | GGCTGCAATAAAGAGGGAAAC              | genotyping                | SALK_152374.35.55 = 71-2                                   |
| priMR 173     | AGCAAAGTTGACAGCTTCAGG              | genotyping                | SALK_152374.35.55 = 71-2                                   |
| priMR 174     | TGGTTAGCCGTTAAACGAAG               | genotyping                | GABI_054H02 = 79-2                                         |
| priMR 175     | TGTTGCTAAGTCGATCTGTG               | genotyping                | GABI_054H02 = 79-2                                         |
| priMR 180     | TGGAACCTTTTTATTGCGGG               | genotyping                | SALK_034196.49.40 = 83-1                                   |
| priMR 181     | GCGCTACCATCTGCATCTTAC              | genotyping                | SALK_034196.49.40 = 83-1                                   |
| priMR 182     | GTAAGATGCAGATGGTAGCGC              | genotyping                | FLAG_148A09 = 83-2                                         |
| priMR 183     | TCTGCAGTTTGGACCATTACC              | genotyping                | FLAG_148A09 = 83-2                                         |
| priMR 184     | AACCGTAAACCCGACATCTTC              | genotyping                | SALK_039162.21.10 = 89-1                                   |
| priMR 185     | TACCAGAACTCCATCAACGG               | genotyping                | SALK_039162.21.10 = 89-1                                   |
| LBb1.3        | ATTTTGCCGATTCGGAAC                 | genotyping SALK lines     |                                                            |
| GBF_AC161_LB1 | ATATTGACCATCATCTCATTTGC            | genotyping GABI-Kat lines |                                                            |
| FL_LB4        | CGTGTGCCAGGTCGCCACGGAATAGT         | genotyping FLAG lines     |                                                            |
| Syg_LB1       | GCCTTTTCAGAAATGGATAAATAGCCTTGCTTCC | genotyping SAIL lines     |                                                            |
| priMR 141     | aaaaagcaggctTCCAAGCAATGAGCGAAA     | cloning                   | LP + attB1 for <b>AT1G29660</b> amplifying 2461bp promoter |
| priMR 142     | agaaagctgggtCGATCTCACAAAACAAAAC    | cloning                   | RP + attB2 for <b>AT1G29660</b> amplifying 2461bp promoter |
| priMR 143     | aaaaagcaggctGGGCCGTACTAAACATCC     | cloning                   | LP + attB1 for <b>AT3G21500</b> amplifying 1441bp promoter |
| priMR 144     | agaaagctgggtCCAACGTATATATAGTGG     | cloning                   | RP + attB2 for <b>AT3G21500</b> amplifying 1441bp promoter |
| priMR 145     | aaaaagcaggctCAAAATGGAGATGATGATTGGA | cloning                   | LP + attB1 for <b>AT5G62210</b> amplifying 991bp promoter  |
| priMR 146     | agaaagctgggtTGTTGTCTCTTGAAAAGAG    | cloning                   | RP + attB2 for <b>AT5G62210</b> amplifying 991bp promoter  |
| priMR 147     | aaaaagcaggcttcgggactttttacattttgaa | cloning                   | LP + attB1 for <b>AT2G47115</b> amplifying 480bp promoter  |
| priMR 167     | agaaagctgggtCGATCAATGCCGTgattt     | cloning                   | RP + attB2 for <b>AT2G47115</b> amplifying 480bp promoter  |
| priMR 151     | aaaaagcaggctggtggcctacggcacttg     | cloning                   | LP + attB1 for <b>AT1G72260</b> amplifying 357bp promoter  |
| priMR 152     | agaaagctgggtcttttgaatggtttacttg    | cloning                   | RP + attB2 for <b>AT1G72260</b> amplifying 357bp promoter  |
| priMR 153     | aaaaagcaggcttcctgctggtgaatttgctg   | cloning                   | LP + attB1 for <b>AT3G20520</b> amplifying 826bp promoter  |
| priMR 154     | agaaagctgggtgtagtgagagcttttca      | cloning                   | RP + attB2 for <b>AT3G20520</b> amplifying 826bp promoter  |
| priMR 157     | aaaaagcaggcttggatgcaatccctcca      | cloning                   | LP + attB1 for <b>AT3G26790</b> amplifying 2220bp promoter |
| priMR 158     | agaaagctgggtctctctcaattggttaac     | cloning                   | RP + attB2 for <b>AT3G26790</b> amplifying 2220bp promoter |
| priMR 159     | aaaaagcaggctacttgccatcggtctctgg    | cloning                   | LP + attB1 for <b>AT2G17710</b> amplifying 858bp promoter  |
| priMR 160     | agaaagctgggtaccacaacttcacctttc     | cloning                   | RP + attB2 for <b>AT2G17710</b> amplifying 858bp promoter  |
| ACT11_F       | AACCTTTCACACTCCTGCCATG             | RT-PCR control gene       | amplification of <i>ACTIN 11</i> transcripts               |
| ACT11_R       | CTGCAAGTCCAAACCGAGA                | RT-PCR control gene       | amplification of <i>ACTIN 11</i> transcripts               |
| WOX9_F        | ccatcaactcggaccagctt               | RT-PCR control gene       | amplification of <i>WOX9</i> transcripts                   |
| WOX9_R        | tccttcacattgaacggctct              | RT-PCR control gene       | amplification of <i>WOX9</i> transcripts                   |
| TT10 FOR      | ATACATCACACAATGCCCGATTC            | RT-PCR control gene       | LP amplifying seed-coat-specific gene <i>TT10</i>          |
| TT10 REV      | CCTCCTGTCTTACGAACTCC               | RT-PCR control gene       | RP amplifying seed-coat-specific gene <i>TT10</i>          |
| priMR 186     | TCAATGACCAGGTTTCGAGTG              | RT-PCR control gene       | LP amplifying seed-coat-specific gene <i>AT5G42530</i>     |
| priMR 187     | CAAGAGGAAGCCAGAACA                 | RT-PCR control gene       | RP amplifying seed-coat-specific gene <i>AT5G42530</i>     |
| FWA FOR       | GTCACATCCACCACTTACCAG              | RT-PCR control gene       | LP amplifying endosperm-specific gene <i>FWA</i>           |
| FWA REV       | GCCACTTGTCCACCGAAGG                | RT-PCR control gene       | RP amplifying endosperm-specific gene <i>FWA</i>           |
| AGL46 FOR     | ATGGCAACAACCTAGTAGATGAA            | RT-PCR control gene       | LP amplifying endosperm-specific gene <i>AGL46</i>         |
| AGL46 REV     | TTGGTTTATGGGATTATGGACTG            | RT-PCR control gene       | RP amplifying endosperm-specific gene <i>AGL46</i>         |
| AGL62 FOR     | CCTCCTCACCAACACAACAAC              | RT-PCR control gene       | LP amplifying endosperm-specific gene <i>AGL62</i>         |
| AGL62 REV     | AGATAACGCAAGTTCCTCAACG             | RT-PCR control gene       | RP amplifying endosperm-specific gene <i>AGL62</i>         |
