# Supplementary material for: Genomic Imprinting in the Arabidopsis Embryo Is Partly Regulated by PRC2
Source: PLoS Genet. 2013 Dec 5;9(12):e1003862. doi: 10.1371/journal.pgen.1003862 (PMC3854695; doi:10.1371/journal.pgen.1003862)
Supplement: Table S4 — Parent-of-origin-dependent expression of confirmed MEGs and the PEG in other embryonic samples. One study analyzed torpedo-staged embryos in reciprocal crosses between Col-0 and Ler [28], whereas the second study analyzed early embryo stages (1–2 cell, 8 cell, 32 cell) from reciprocal crosses between Col-0 and Cvi [34]. (XLS) [file pgen.1003862.s015.xls]

## Sheet: Table_S4
Table S4. Parent-of-origin dependent expression of confirmed MEGs and PEGs in other embryonic cDNA libraries. One study analyzed torpedo staged embryos in reciprocal crosses between Col-0 and Ler (Gehring et al. 2011, PLoS ONE 6: e23687), whereas the second study analyzed early embryo stages (1-2cell, 8cell, 32cell) from reciprocal crosses between Col-0 and Cvi (Nodine and Bartel 2012, Nature 482…
	Gehring et al. 2011, PLoS ONE 6: e23687							Nodine and Bartel, 2012, Nature 482: 94-97
	torpedo stage							1-2cell					8cell					32cell
	Col-0 x Ler		Ler x Col-0					Col-0 x Cvi		Cvi x Col-0			Col-0 x Cvi		Cvi x Col-0			Col-0 x Cvi		Cvi x Col-0
	Reads overlapping SNPs		Reads overlapping SNPs					Reads overlapping SNPs		Reads overlapping SNPs			Reads overlapping SNPs		Reads overlapping SNPs			Reads overlapping SNPs		Reads overlapping SNPs
Gene ID	Col reads	Ler reads	Col reads	Ler reads	parent-of-origin	comments		Col reads	Ler reads	Col reads	Ler reads		Col reads	Ler reads	Col reads	Ler reads		Col reads	Ler reads	Col reads	Ler reads	parent-pf-origin	comments
AT1G29660	0	2	0	1	Ler bias	few reads		10	0	0	0		1	3	0	1		0	0	6	6	biallelic	few reads
AT1G72260	0	0	0	2	maternal	few reads		0	0	0	4		2	0	0	1		0	0	0	0	maternal	few reads
AT2G47115	0	0	0	0	not expressed			0	0	0	0		0	0	0	5		0	0	0	6	maternal	few reads
AT5G62210	3	8	2	10	biallelic			0	0	0	0		0	0	0	11		4	0	0	5	maternal
AT3G20520	1	0	1	3	maternal bias			0	0	0	14		0	0	0	9		2	0	0	5	maternal
AT2G17710	19	3	7	44	maternal bias			23	7	0	13		11	0	4	10		9	0	9	15	biallelic
AT3G21500	2	0	0	2	maternal	few reads		5	0	0	0		7	0	0	19		1	0	0	2	maternal
AT2G01520	3	0	0	1	maternal	few reads		0	11	0	9		22	0	0	32		2	0	0	6	maternal bias
AT1G20680	0	0	0	5	maternal	few reads		0	0	0	3		5	0	0	5		0	0	0	0	maternal
AT5G51950	5	0	0	3	maternal	few reads		2	1	0	0		7	0	0	2		1	0	0	25	maternal bias
AT1G29050	28	4	3	59	maternal bias			0	0	0	0		0	0	0	0		0	0	0	0	not expressed	no SNPs covered
AT3G26790	112	75	80	63	biallelic			0	0	5	0		0	0	0	0		0	0	0	0	early PEG
AT1G027801	6111	4662	7734	6851	biallelic			0	1	0	0		1	0	0	1		0	1	0	0	not expressed
1 biallelic control gene
